# Supplementary material
Source: publisher site journal article supplement (https://www.dovepress.com/article/495059)
Supplement: Supplementary file 1 [file get_supplementary_file.php]

Table S1 Characteristics of the cohorts

| **Variable** | **Training cohort** |
| --- | --- |
| 146 |
| Antiviral Therapy |  |
| Absent | 49 (33.56%) |
| Present | 97 (66.44%) |
|  |  |
| Hepatic Cirrhosis Nodules |  |
| Absent | 57 (39.04%) |
| Present | 89 (61.96%) |
|  |  |
| Tumor Size ( cm ) | 4.00 (2.85 - 6.45) |
|  |  |
| Tumor Number |  |
| 1 | 115 (78.77%) |
| 2 | 20 (13.70%) |
| 3 | 7 (4.79%) |
| 4 | 2 (1.37%) |
| 5 | 2 (1.37%) |
|  |  |
| BCLC |  |
| Stage 0 | 8 (5.48%) |
| Stage A | 99 (67.81%) |
| Stage B | 21 (14.38%) |
| Stage C | 18 (12.33%) |

BCLC: Barcelona Clinic Liver Cancer

| **Table S2 Univariate and multivariate Cox proportional hazard regression analysis of prognostic factors of OS in training cohort** | | | | | |
| --- | --- | --- | --- | --- | --- |
| **Variables** |  | **Univariate analysis** | ***P*** | **Multivariate analysis** | ***P*** |
|  | **HR (95%CI)** | **HR (95%CI)** |
| Gender | Female | 1.00 |  | - | - |
| Male | 1.62  (0.83, 3.17) | 0.16 | - | - |
|  |  |  |  |  |  |
| Age | ＜60 | 1.00 |  | - | - |
| ≥60 | 1.26  (0.77, 2.07) | 0.36 | - | - |
|  |  |  |  |  |  |
| BMI |  | 1.08  (1.01, 1.15) | 0.02 | 0.10  (0.03, 0.17) | 0.01 |
|  |  |  |  |  |  |
| AFP | ≤20 | 1.00 |  | - | - |
| ＞20 - ≤400 | 1.19  (0.69, 2.06) | 0.54 | - | - |
| ＞400 | 1.66  (0.93, 2.93) | 0.08 | - | - |
|  |  |  |  |  |  |
| Total Bilirubin | Normal | 1.00 |  | - | - |
| Higher_than_normal | 1.17  (0.51, 2.72) | 0.71 | - | - |
|  |  |  |  |  |  |
| ALB | Normal | 1.00 |  | - | - |
| Below_normal_values | 1.64  (1.03, 2.60) | 0.04 | 0.55  (0.06, 1.00) | 0.03 |
|  |  |  |  |  |  |
| Platelet | Normal | 1.00 |  | - | - |
| Below_normal_values | 1.04  (0.65, 1.68) | 0.87 | - | - |
|  |  |  |  |  |  |
| Creatinine | Normal | 1.00 |  | - | - |
| Below_normal_values | 0.77  (0.37, 1.61) | 0.49 | - | - |
|  |  |  |  |  |  |
| Child-Pugh Classification | A | 1.00 |  | - | - |
| B | 1.17  (0.47, 2.91) | 0.73 | - | - |
|  |  |  |  |  |  |
| Vascular Invasion | None | 1.00 |  | - | - |
| Micro | 2.39  (1.28, 4.44) | 0.01 | 0.70  (-0.07, 1.50) | 0.08 |
| Macro | 2.10  (1.11, 3.96) | 0.02 | -0.26  (-0.98, 0.47) | 0.49 |
|  |  |  |  |  |  |
| Surgical Resection Method | Segmentectomy_Single | 1.00 |  |  |  |
| Segmentectomy_Multiple | 1.62  (0.78, 3.37) | 0.20 | 0.27  (-0.49, 1.00) | 0.49 |
| Lobectomy | 2.10  (1.12, 3.95) | 0.02 | 0.64  (-0.03, 1.30) | 0.06 |
| Extended_  Lobectomy | 3.63  (1.99, 6.61) | 0.00 | 0.85  (0.15, 1.60) | 0.02 |
|  |  |  |  |  |  |
| Neoplasm Histologic Grade | G1/2 | 1.00 |  | - | - |
| G3/4 | 1.17  (0.73, 1.9) | 0.51 | - | - |
|  |  |  |  |  |  |
| AJCC | Stage I | 1.00 |  | - | - |
| Stage II | 1.43  (0.77, 2.66) | 0.26 | 0.02  (-0.68, 0.73) | 0.95 |
| Stage III | 10.12  (5.41, 18.92) | 0.00 | 2.00  (1.40, 2.70) | <0.001 |
|  |  |  |  |  |  |
| ALBI | 1 | 1.00 |  | - | - |
| 2 | 1.38  (0.87, 2.21) | 0.17 | - | - |
| 3 | 0.00  (0.00, Inf) | 1.00 | - | - |
|  |  |  |  |  |  |
| PALBI | 1 | 1.00 |  | - | - |
| 2 | 0.97  (0.59, 1.61) | 0.91 | - | - |
| 3 | 1.66  (0.78, 3.55) | 0.19 | - | - |
| OS: overall survival; BMI: body mass index; AFP: alpha-fetoprotein; ALB: albumin; AJCC: American Joint Committee on Cancer; ALBI: albumin-bilirubin; PALBI: platelet-albumin-bilirubin; | | | | | |
|
|
